# Supplementary material
Source: publisher site journal article supplement (https://www.dovepress.com/get_supplementary_file.php?f=408044.docx)
Supplement: Supplementary file 1 [file get_supplementary_file.php]

**SUPPLEMENTARY MATERIALS: Inclusion and Exclusion Criteria**

**General Inclusion Criteria**

1. Provides a signed and dated informed consent form
2. Is between 18 and 64 years of age (inclusive; male or female and any race or ethnicity)
3. If taking a prescription or over-the-counter pain medication (including migraine-specific medications, such as triptans and ergots), agrees to discontinue its use for 3 days prior to the study visit
4. Willing and able to understand and comply with all study procedures

**General Exclusion Criteria**

1. Participants with severe hepatic, respiratory, hematologic, or immunologic illnesses, unstable cardiovascular disease, or other severe acute or chronic medical or psychiatric disease
2. Participants with chronic widespread pain, classified according to the American College of Rheumatology (ACR) 2016 fibromyalgia diagnostic criteria
3. Participants with trigeminal autonomic cephalalgias or painful cranial neuropathies within 3 months prior to the study visit
4. Participants with odontogenic pain within 30 days prior to the study visit
5. History of head trauma or surgery within 6 weeks prior to the study visit
6. History of major depression or other psychiatric disorders requiring hospitalization within 6 months prior to the study visit
7. History of treatment for drug or alcohol abuse within 1 year prior to the study visit
8. History of chemotherapy or radiation therapy within 30 days prior to the study visit
9. Used botulinum toxin injections in the head, neck or shoulder region or anti-CGRP monoclonal antibody injections within 4 months prior to the study visit
10. Used opioid or barbiturate medications for more than 4 days within 30 days prior to the study visit
11. Used daily preventive medications, such as gabapentinoids, tricyclic antidepressants (TCAs), selective serotonin-norepinephrine reuptake inhibitors (SNRIs), beta-blockers, lithium, verapamil, and anti-epileptic drugs, for a chronic pain condition within 2 months prior to the study visit
12. History of investigational drug (or procedures) for pain management within 30 days prior to the study visit
13. Is pregnant or breastfeeding
14. Anything that, in the opinion of the investigator, would place the participant at increased risk or preclude the participant’s full compliance with the study

**TMD Inclusion Criteria**

To be eligible to participate in this study as a TMD participant, an individual must meet all the following criteria:

1. Meets the Diagnostic Criteria for TMD (DC/TMD) with a classification of myalgia and/or arthralgia[2](#_ENREF_2)
2. Has experienced facial pain for at least 3 months
3. Has experienced facial pain for at least 10 days in the last 30 days
4. Report an average facial pain intensity rating in the past week of ≥ 30 on a numerical rating scale of ‘0’ to ‘100’ (where ‘0’ is no pain and ‘100’ is the worst imaginable pain)

**TMD Exclusion Criteria**

An individual who meets any of the following criteria will be excluded from participation in this study as a TMD participant:

1. Used injection therapy (such as head and neck muscle or TMJ injections) for TMD pain management within 2 weeks prior to the study visit

**Migraine Inclusion Criteria**

To be eligible to participate in this study as a migraine participant, an individual must meet all the following criteria:

1. Meets ICHD-3 diagnostic criteria for episodic or chronic migraine
2. Has experienced migraine for at least 4 days per month in the last 3 months

**Migraine Exclusion Criteria**

An individual who meets any of the following criteria will be excluded from participation in this study as a migraine participant:

1. Migraine onset after age of 50 years
2. Used interventions or devices for migraine treatment, such as nerve blocks or transcranial magnetic stimulation, within 2 months prior to the study visit

**Healthy Control Exclusion Criteria**

An individual who meets any of the following criteria will be excluded from participation in this study as a control:

1. Participants with painful TMD or migraine within 1 year prior to the study visit, classified according to DC/TMD and ICHD-3 diagnostic criteria, respectively
2. Participants with frequent tension-type headache with >4 headache days per month within 3 months prior to the study visit
